# Supplementary material
Source: Springer Nature journal article supplement (https://www.springermedizin.de/resource/supplementary/12974_2011_463_MOESM7_ESM.pdf/9601334)

24 h

48h

24 h

48h

**A**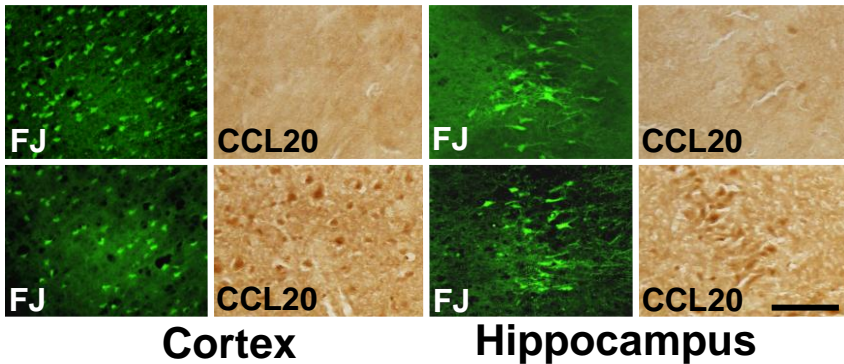**Cortex****Hippocampus****B**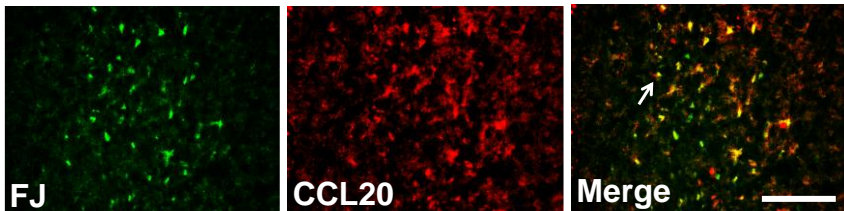**FJ****CCL20****Merge**

Supplement: MOESM7 [file 9601334]
